# Supplementary material for: Lymphocyte activation gene 3 (Lag3) expression is increased in prion infections but does not modify disease progression
Source: PubMed Central journal article supplement (PMC6168446; doi:10.1038/s41598-018-32712-8), 2018-10-02

# **Lymphocyte activation gene 3 (Lag3) expression is increased in prion infections but does not modify disease progression**

Yingjun Liu <sup>1\*</sup>, Silvia Sorce <sup>1</sup>, Mario Nuvolone <sup>1,2</sup>, Julie Domange <sup>1</sup>, Adriano Aguzzi <sup>1\*</sup>

1 Institute of Neuropathology, University of Zurich, Schmelzbergstrasse 12, CH-8091 Zurich, Switzerland

2 Amyloidosis Research and Treatment Center, Foundation Scientific Institute Policlinico San Matteo, Department of Molecular Medicine, University of Pavia, Pavia, Italy

\*Corresponding author:

Adriano Aguzzi

Institute of Neuropathology, University of Zurich

Schmelzbergstrasse 12, CH-8091 Zurich, Switzerland

Tel: +41 44 255 2107; Fax: +41 44 255 44 02

Or

Yingjun Liu

Institute of Neuropathology, University of Zurich

Schmelzbergstrasse 12, CH-8091 Zurich, Switzerland

Tel: +41 44 255 32 36; Fax: +41 44 255 44 02

**Supplementary Fig 1.**

**Depletion of Lag3 in the brain of Lag3 KO mice.** qRT-PCR results of Lag3 expression in the brains of Lag3 WT and KO mice. \*\*\* P< 0.001 (n=3).

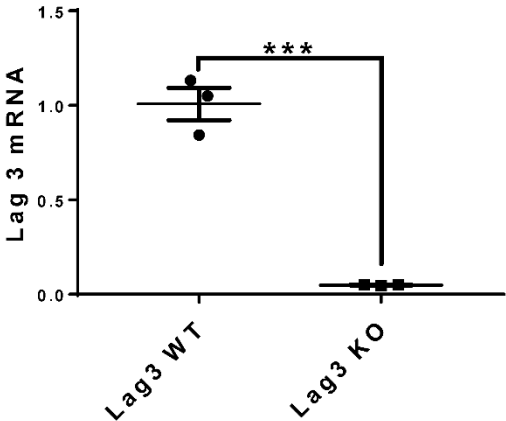

**Supplementary Fig 2.**

**PrP<sup>C</sup> protein levels in the brains of Lag3 WT and KO mice.** **A**, representative images of PrP<sup>C</sup> western blot in the brains of Lag3 WT and KO mice. **B**, quantitative data of PrP<sup>C</sup> protein levels shown in **A**. n=5. n.s, not significant. Full-length images of the blots shown in A are included in Supplementary Fig 3.

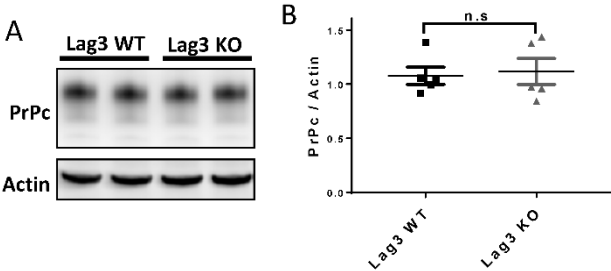

**Supplementary Fig 3.**

**Full-length images of the blots shown in Supplementary Fig 2 A.**

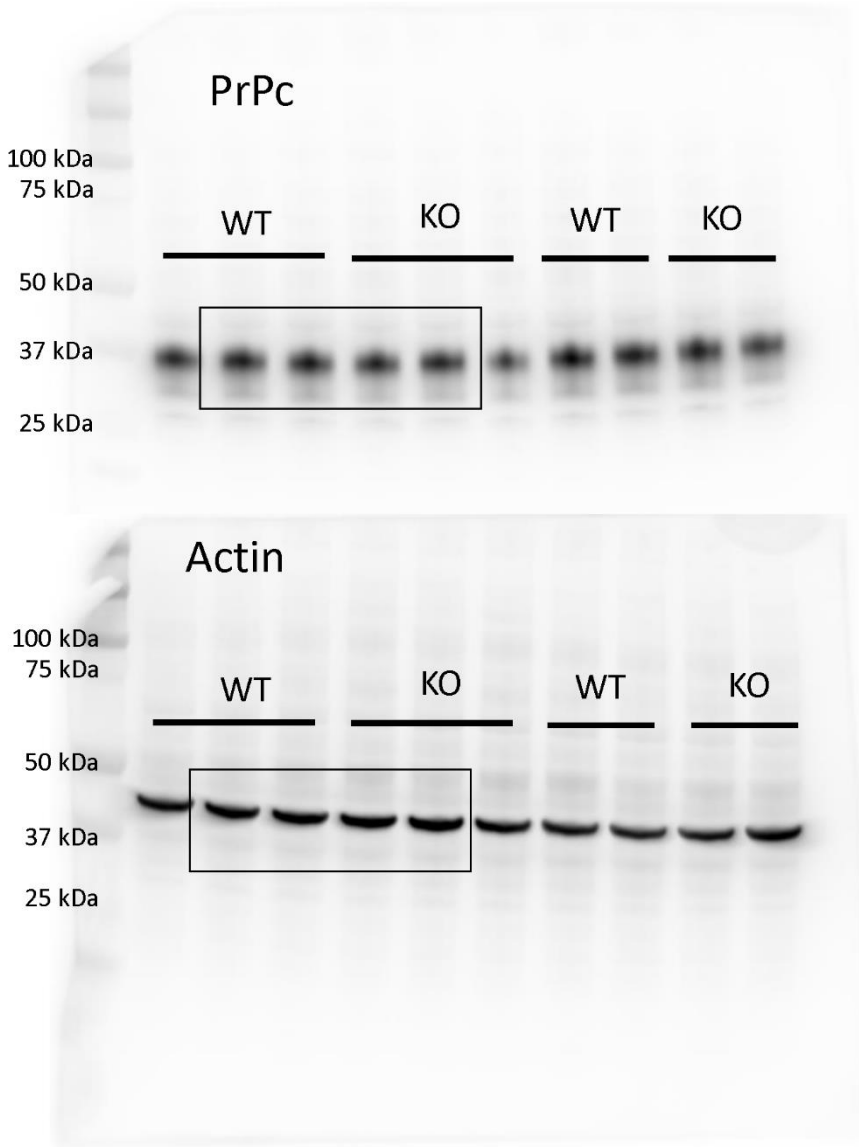

**Supplementary Fig 4.**

**Full-length image of the blot shown in Fig 2 B.**

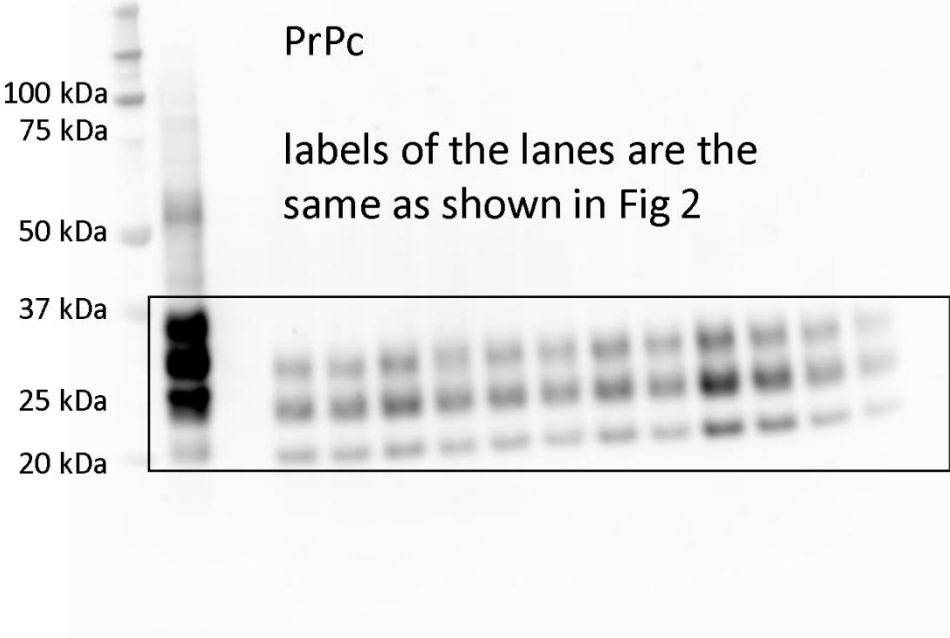

Supplementary Fig 5.

Full-length images of the blots shown in Fig 3 A.

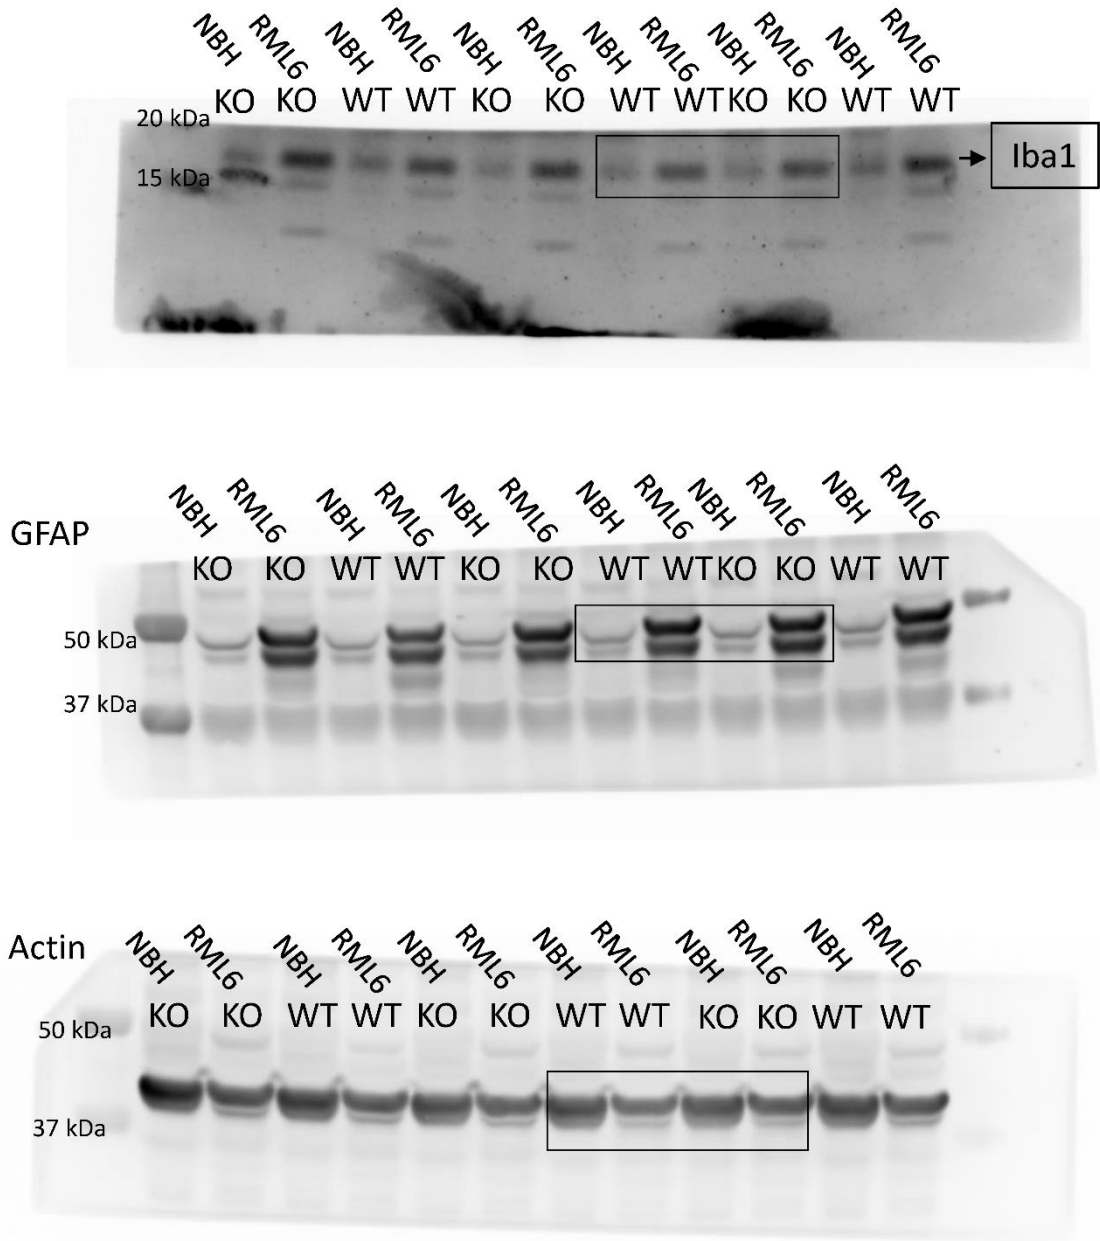

Supplement: 41598_2018_32712_MOESM1_ESM.pdf [file 41598_2018_32712_MOESM1_ESM.pdf]
